# Supplementary material
Source: PubMed Central journal article supplement (PMC3730851)
Supplement: NIHMS487347-supplement-1.pdf [file NIHMS487347-supplement-1.pdf]

## **Supplementary Information**

### **Synthetic glycopeptides reveal the glycan specificity of HIV-neutralizing antibodies**

Mohammed N. Amin,<sup>1</sup> Jason S. McLellan,<sup>2</sup> Wei Huang,<sup>1</sup> Jared Orwenyo,<sup>1</sup> Dennis R. Burton<sup>3,4</sup>,

Wayne C. Koff,<sup>5</sup> Peter D. Kwong,<sup>2</sup> Lai-Xi Wang<sup>1\*</sup>

<sup>1</sup>Institute of Human Virology, Department of Biochemistry & Molecular Biology, University of Maryland  
School of Medicine, Baltimore, MD 21201, USA

<sup>2</sup>Vaccine Research Center, National Institute of Allergy and Infectious Diseases, National Institutes of  
Health, Bethesda, Maryland 20892, USA.

<sup>3</sup>Department of Immunology and Microbial Science and IAVI Neutralizing Antibody Center, The Scripps  
Research Institute, La Jolla, California 92037, USA.

<sup>4</sup>Ragon Institute of MGH, MIT, and Harvard, Cambridge, Massachusetts 02129, USA.

<sup>5</sup>International AIDS Vaccine Initiative (IAVI), New York, NY 10038, USA.

## Supplementary Results

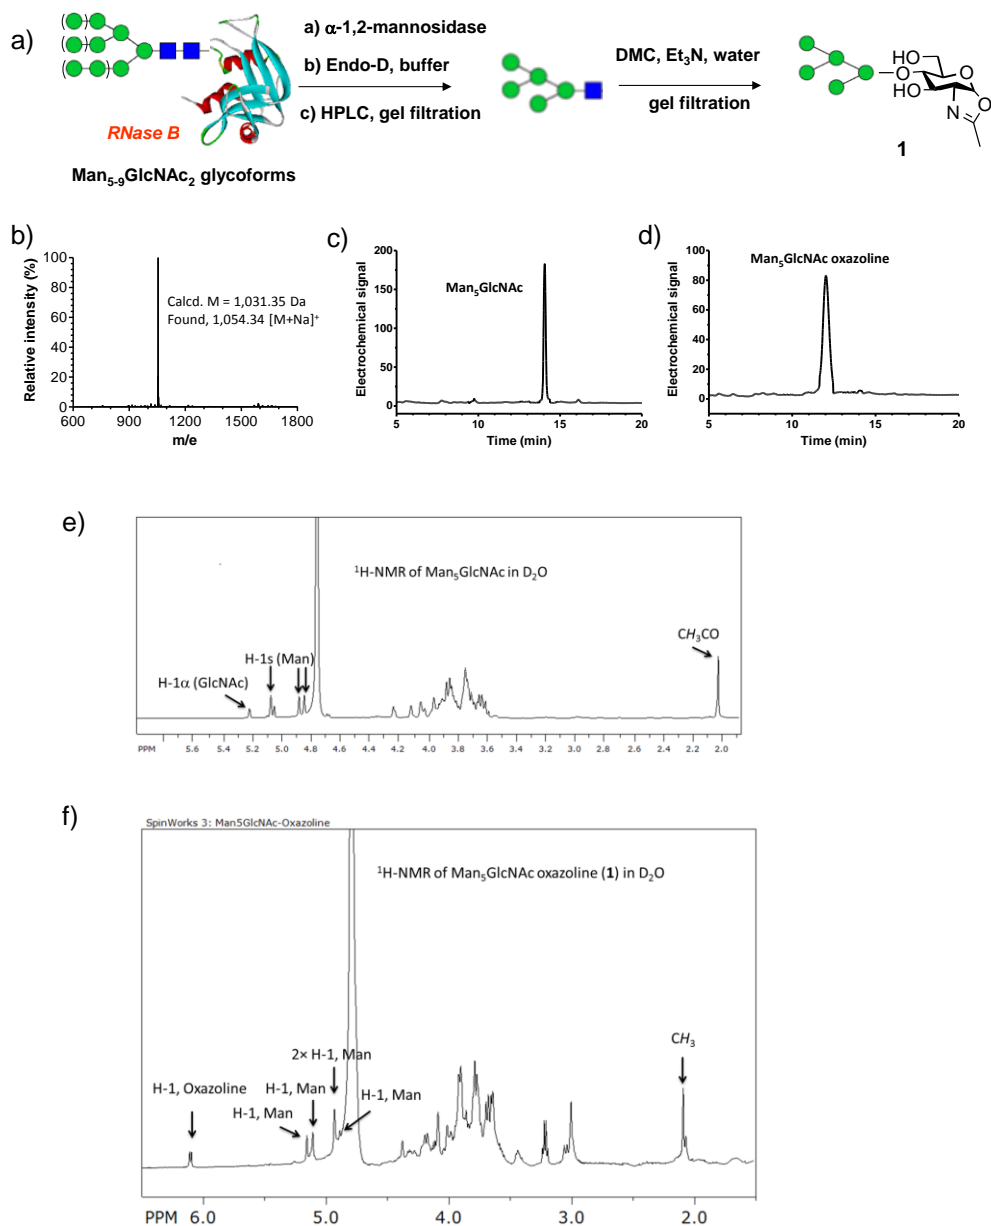

**Supplementary Figure 1. Synthesis and characterization of Man<sub>5</sub>GlcNAc oxazoline (1).** a) Synthesis of Man<sub>5</sub>GlcNAc oxazoline (1); b) MALDI-TOF MS of Man<sub>5</sub>GlcNAc; c) HPAEC (Dionex) of Man<sub>5</sub>GlcNAc; d) HPAEC (Dionex) of Man<sub>5</sub>GlcNAc oxazoline; e) <sup>1</sup>H-NMR of Man<sub>5</sub>GlcNAc in D<sub>2</sub>O; f) <sup>1</sup>H-NMR of Man<sub>5</sub>GlcNAc oxazoline (1) in D<sub>2</sub>O.

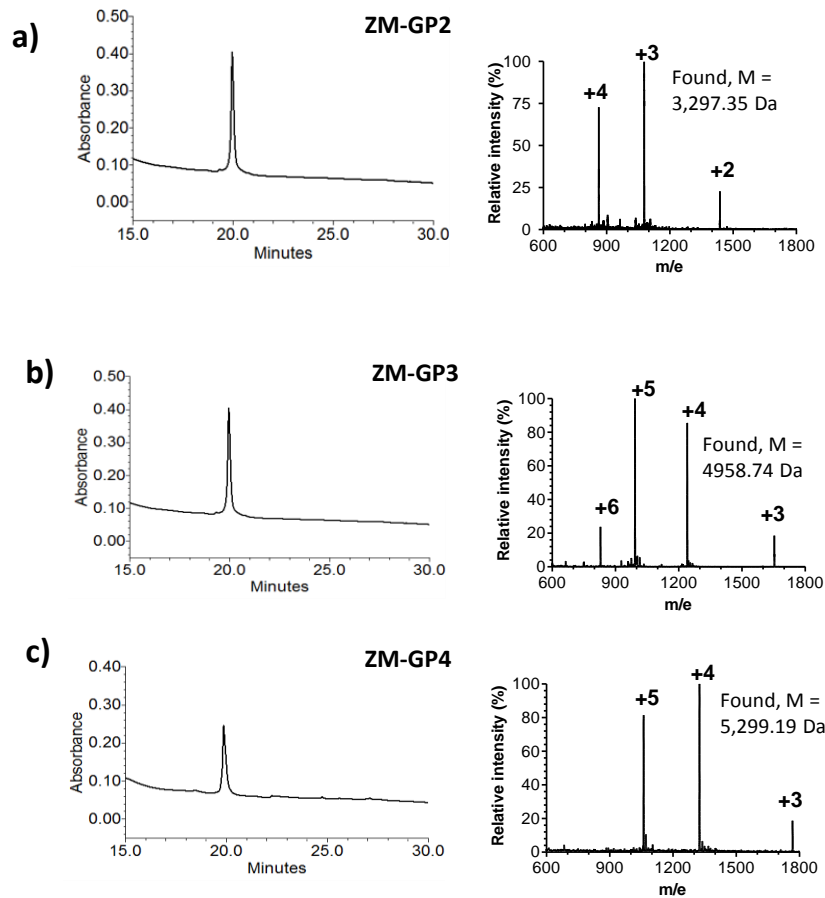

**Supplementary Figure 2. HPLC and ESI-MS profile of the synthetic ZM109 V1V2 glycopeptides carrying an N-glycan at N160 position.** The HPLC was performed on a C18 column with a linear gradient of 0-90% MeCN in 30 min. a) ZM-GP2; b) ZM-GP3; and c) ZM-GP4.

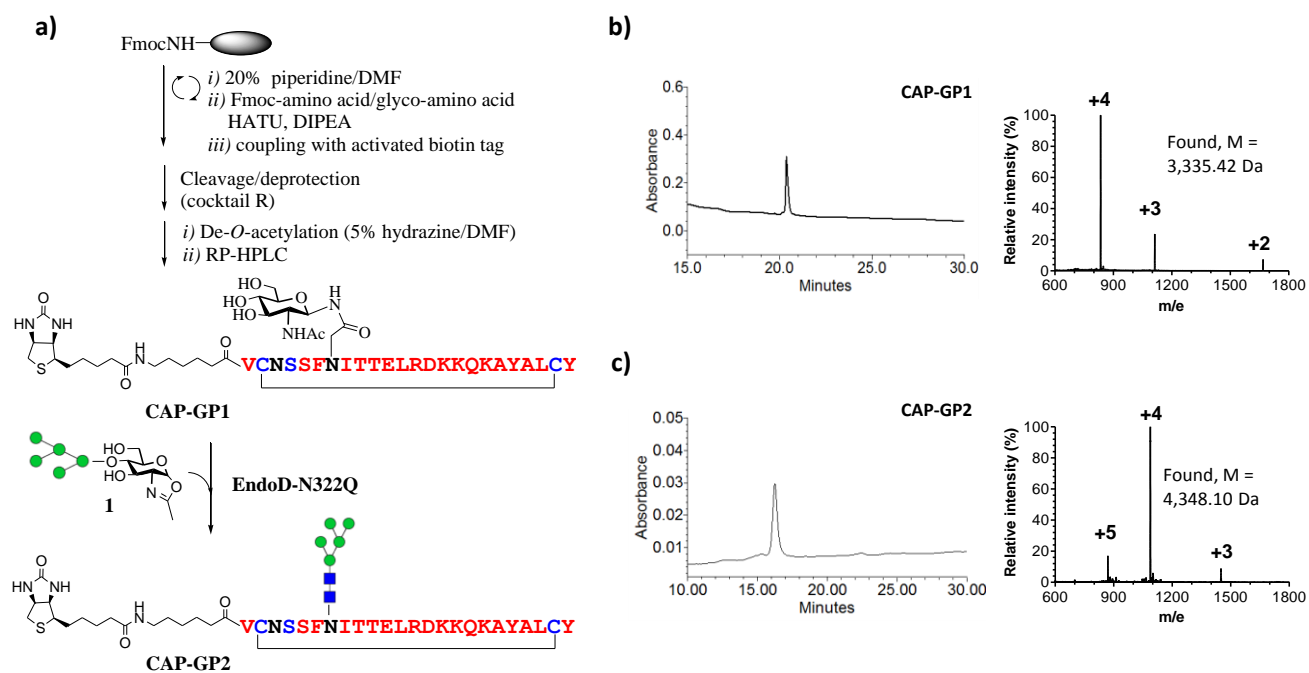

**Supplementary Figure 3. Synthesis and characterization of N160-glycosylated CAP-GP2.** a) Synthesis scheme; b) HPLC and ESI-MS profiles of synthetic CAP-GP1; c) HPLC and ESI-MS profiles of synthetic CAP-GP2 (The HPLC was performed on a C18 column with a linear gradient of 0-90% MeCN in 30 min.).

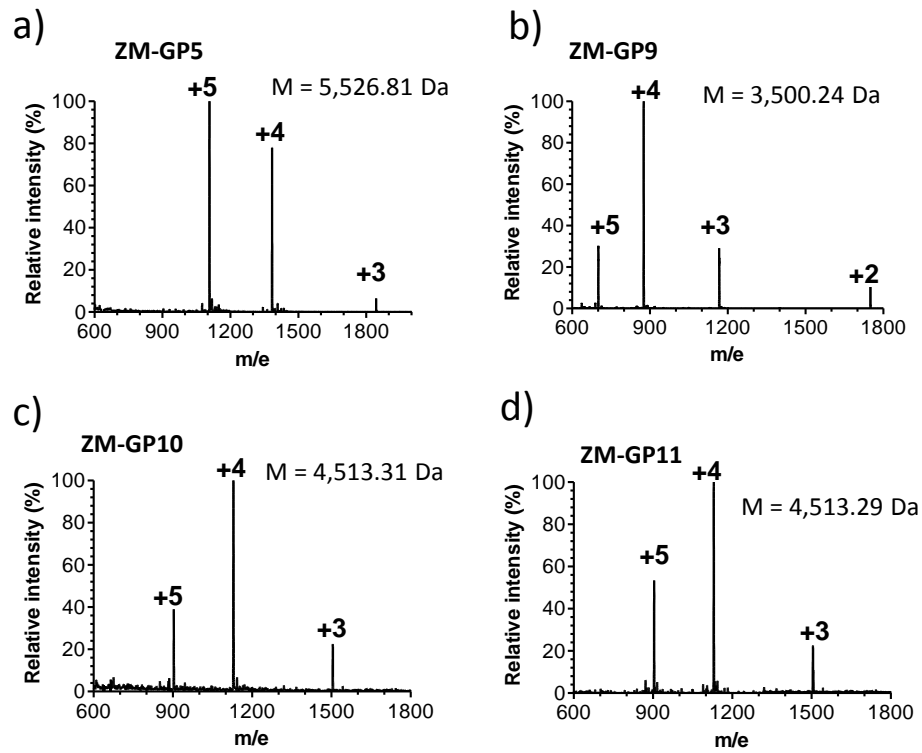

**Supplementary Figure 4. The ESI-MS profiles of selectively glycosylated ZM109 V1V2 glycopeptides. a) ZM-GP5; b) ZM-GP9; c) ZM-GP10; and d) ZM-GP11.**

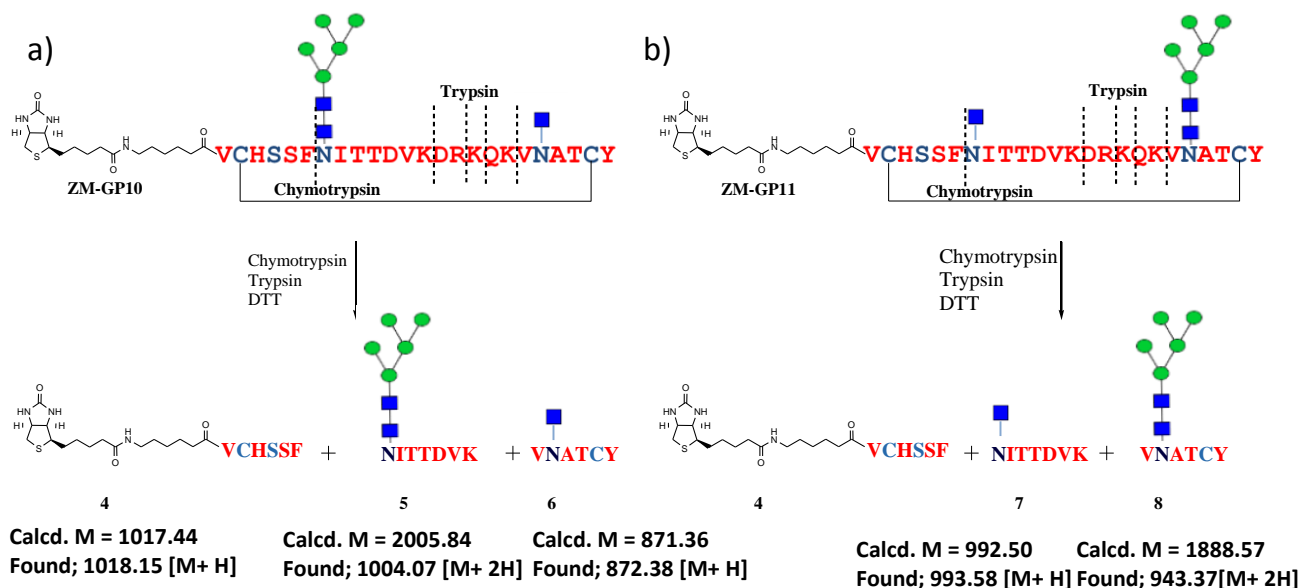

**Supplementary Figure 5. Characterization of site-selective glycosylation products of ZM-GP10 and ZM-GP11.** Treatment of ZM-GP10 with a mixture of chymotrypsin (specific for cleaving phenylalanine amide bond) and trypsin (specific for cleaving lysine and arginine amide linkage), followed by dithiothreitol (DTT) to cleave the disulfide bond, gave three major peptide/glycopeptide fragments: the biotinylated N-terminal fragment (**4**) (calcd M = 1016.44 Da; found (m/z), 1017.66 [M + H]<sup>+</sup>), the internal fragment (**5**) carrying a Man<sub>5</sub>GlcNAc<sub>2</sub> glycan (calcd M = 2005.84 Da; found (m/z), 1004.07 [M+ 2H]<sup>2+</sup>), and the C-terminal fragment carrying only a GlcNAc moiety (calcd M = 871.28 Da; found (m/z), 872.38 [M + H]<sup>+</sup>). These data suggest that the transferred N-glycan was attached at the N160 position in ZM-GP10. Similarly, treatment of the other isomer (ZM-GP11) with chymotrypsin/trypsin and then DTT gave fragments **4**, **7**, and **8**. LC-MS analysis of **7** (calcd M = 992.50 Da; found (m/z); 993.58 [M + H]<sup>+</sup>) and **8** (calcd M = 1888.57 Da; found (m/z), 943.37 [M + 2H]<sup>2+</sup>) indicated that fragment **7** carried only a GlcNAc moiety and fragment **8** carried a Man<sub>5</sub>GlcNAc<sub>2</sub> glycan. These results confirm that in ZM-GP11, the Man<sub>5</sub>GlcNAc<sub>2</sub> is attached at the N173 site while a GlcNAc is attached at the N160 site.

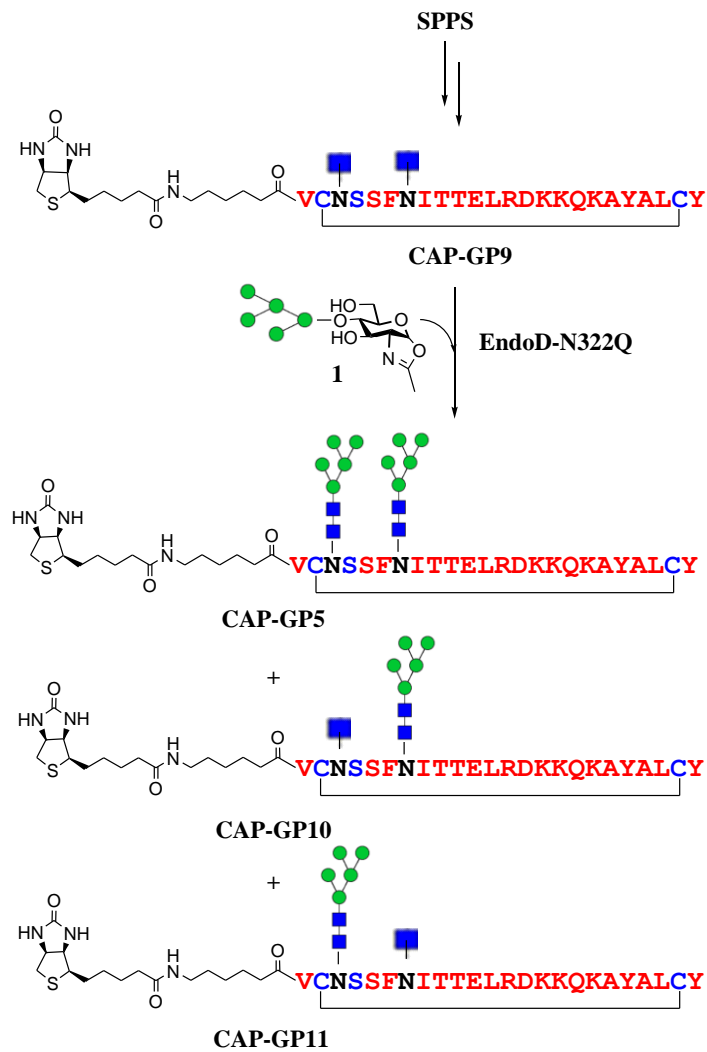

**Supplementary Figure 6. Controlled glycosylation of the CAP glycopeptides**

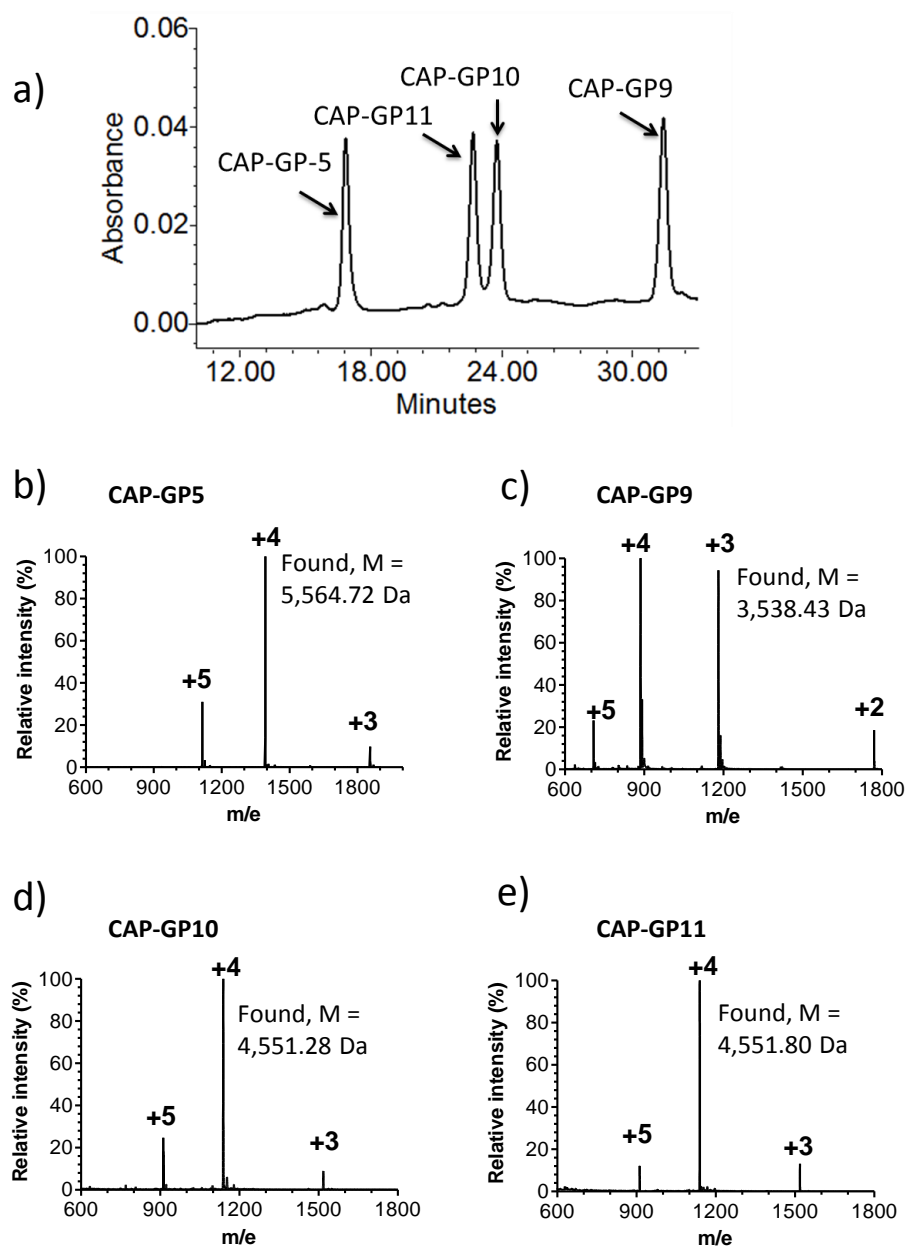

**Supplementary Figure 7. ESI-MS profile of selectively glycosylated CAP45 V1V2 glycopeptides.**  
 a) CAP-GP5; b) CAP-GP9; c) CAP-GP10; and d) CAP-GP11.



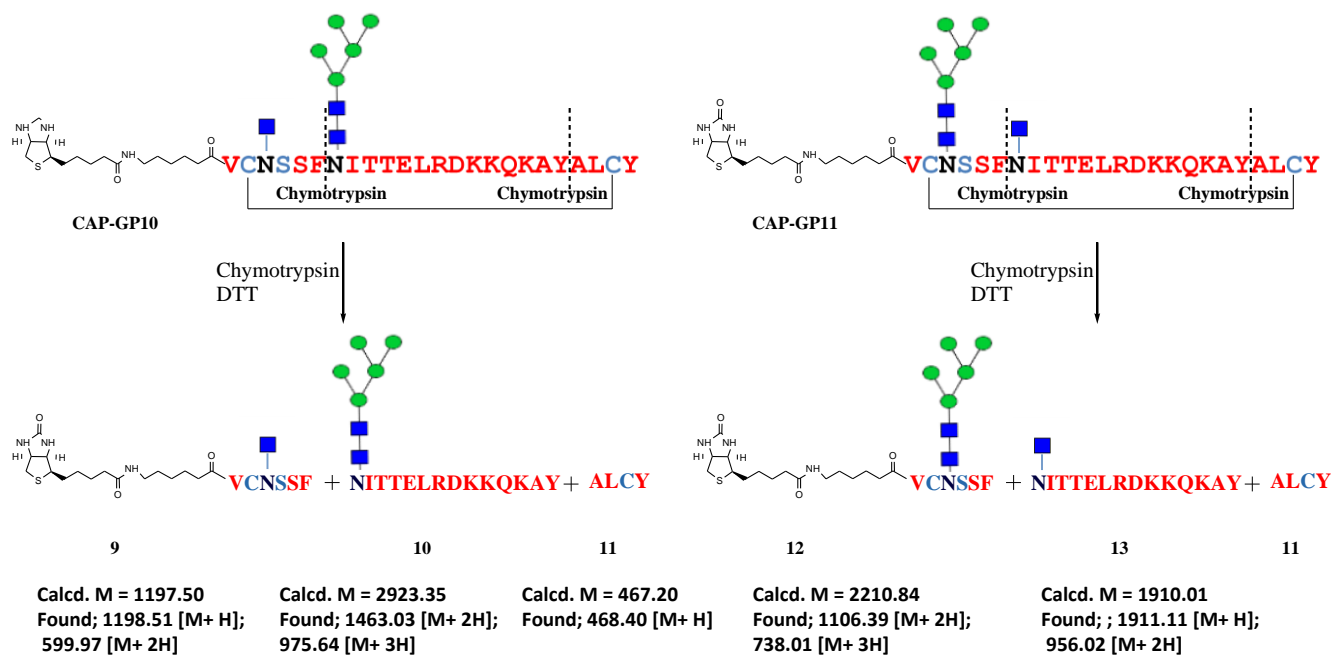

**Supplementary Figure 8. Characterization of glycosylation sites of CAP-GP10 and CAP-GP11.** The assignment was performed in the similar way as demonstrated for ZM-GP10 and ZM-GP11. Briefly, treatment of CAP-GP10 or CAP-GP11 with Chymotrypsin and DTT, followed by LC-MS analysis of the digestion fragments (**9**, **10**, **11**, **12**, and **13**) confirmed that the Man<sub>5</sub>GlcNAc<sub>2</sub> glycan was attached at the N160 position in CAP-GP10 while this glycan was attached at N173 in CAP-GP11.

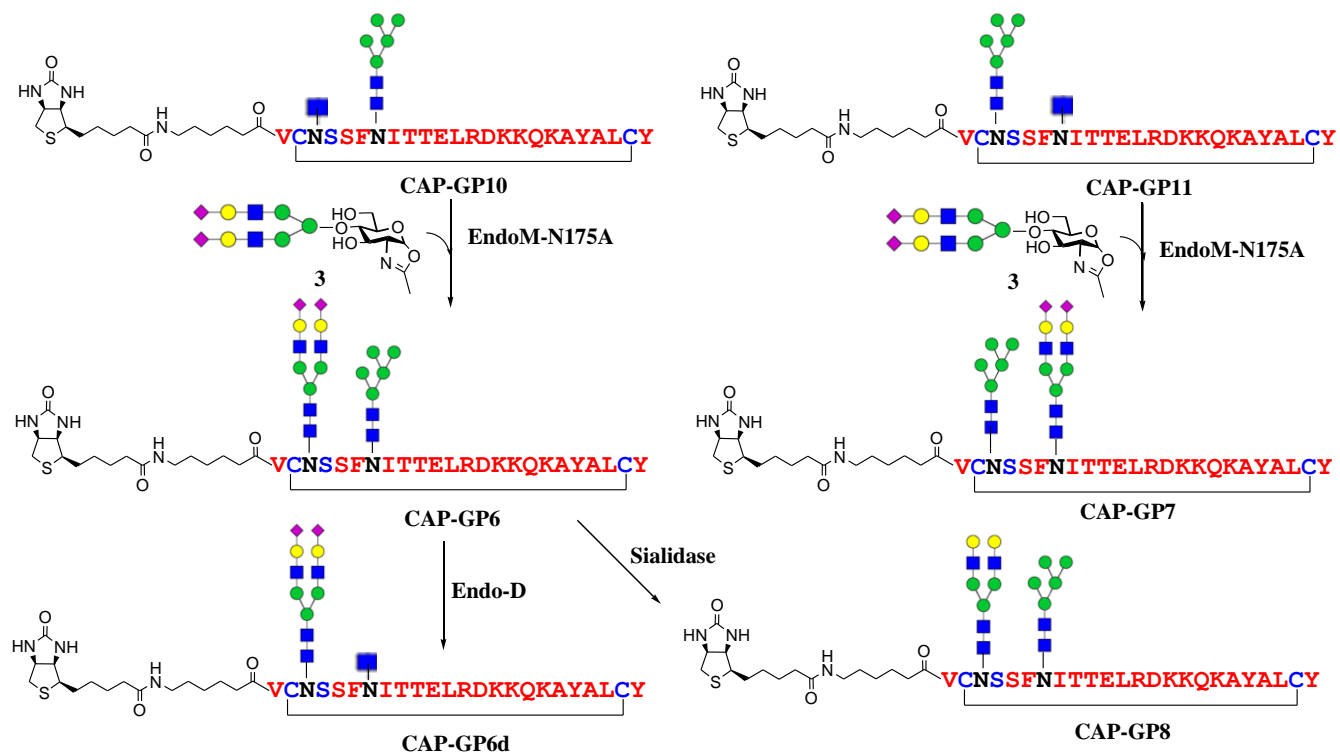

**Supplementary Figure 9. Chemoenzymatic synthesis of distinctly double-glycosylated CAP45 glycopeptides**

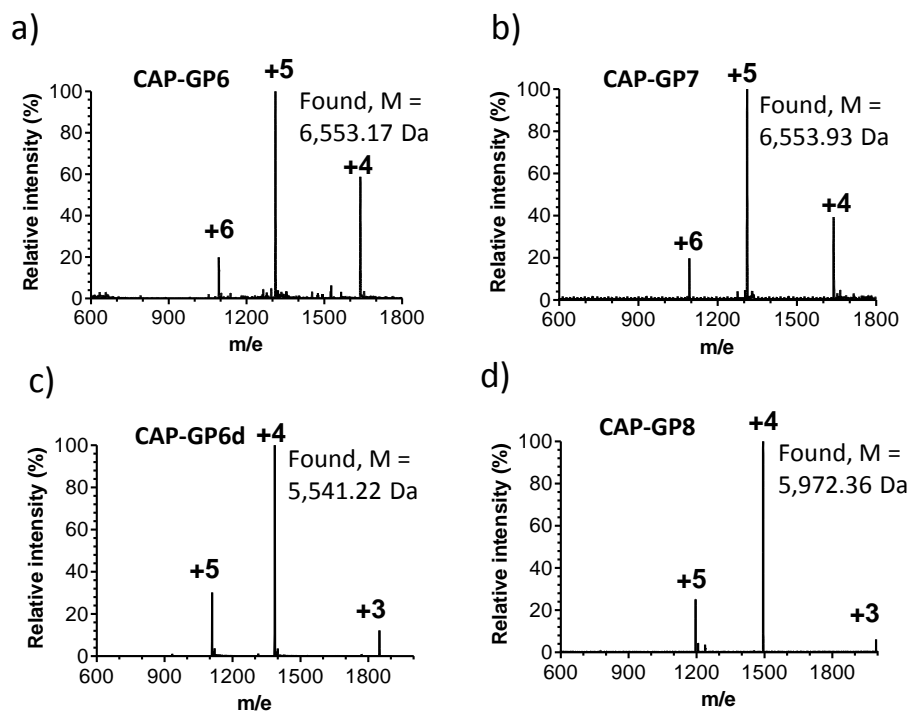

**Supplementary Figure 10. ESI-MS profile of the double-glycosylated CAP45 V1V2 glycopeptides. a) CAP-GP6; b) CAP-GP7; c) CAP-GP6d; and d) CAP-GP8.**

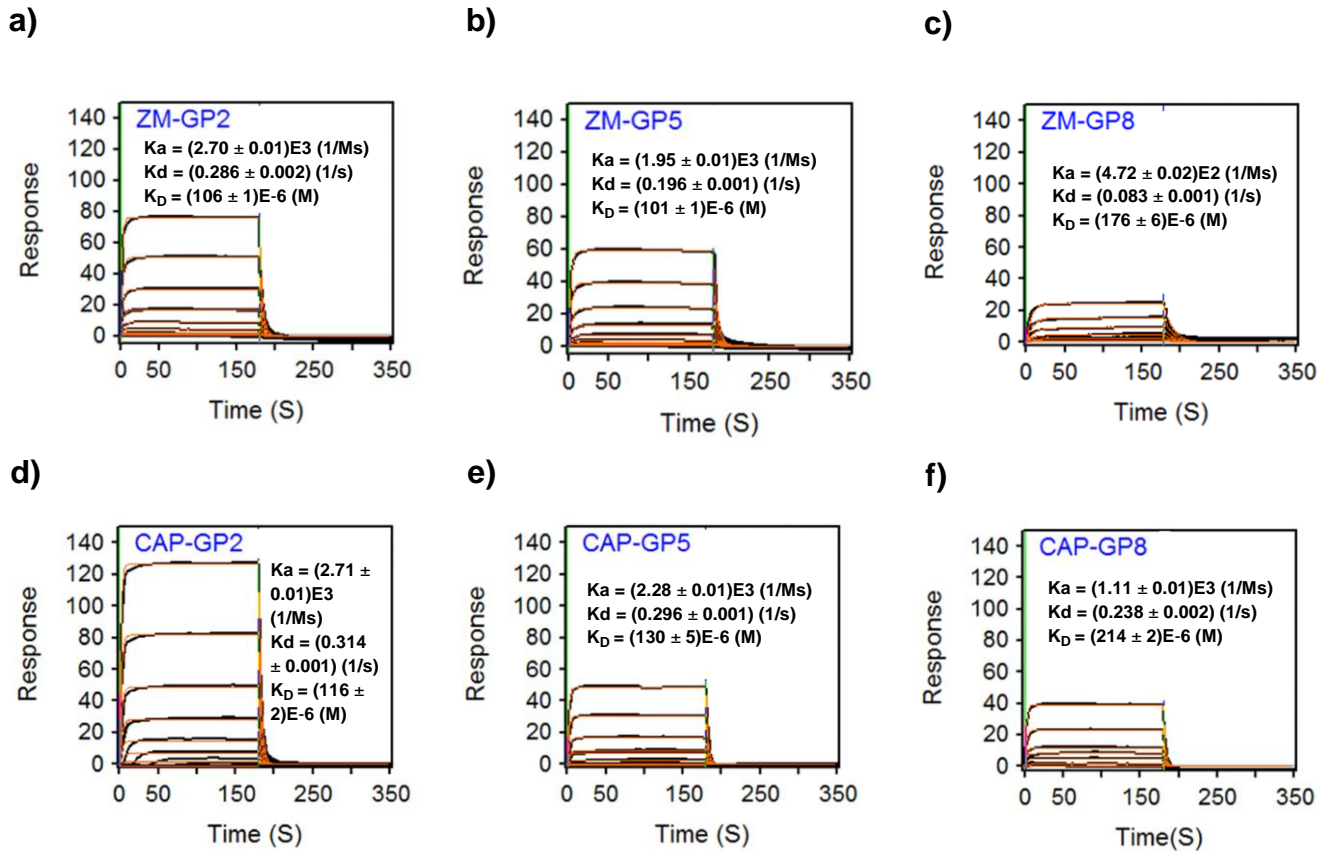

**Supplementary Figure 11. Antibody PG9 Fab binding to synthetic ZM- and CAP-glycopeptides.** Biotinylated glycopeptides were immobilized on streptavidin chips and antibody PG9 FAB flowed through as analytes. The surface-plasmon resonance sensorgrams were recorded with 2-fold serial dilutions starting at the highest concentration of 100  $\mu$ M. The respective fitted curves were shown in orange and the kinetic data were shown as inserts. a) ZM-GP2; b) ZM-GP5; c) ZM-GP8; d) CAP-GP2; e) CAP-GP5; f) CAP-GP8. The binding of ZM-GP6 and CAP-GP6 with PG9 Fab was shown in Fig. 5 in the text. The following ZM- and CAP-glycopeptides did not show apparent binding responses at up to 100  $\mu$ M: ZM-GP1, ZM-GP3, ZM-GP4, ZM-GP7, ZM-GP9; CAP-GP1; CAP-GP7, CAP-GP9; and those non-glycosylated peptides.

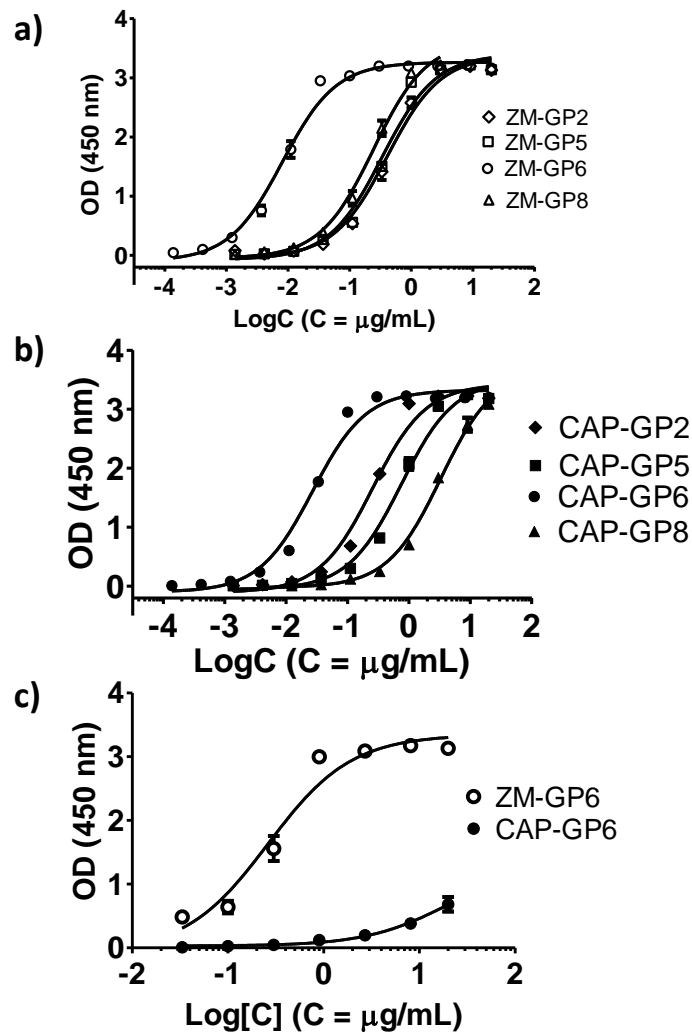

**Supplementary Figure 12. ELISA binding of PG9 and PG16 to synthetic V1V2 glycopeptides.** a) PG9 with ZM109 glycopeptides; b) PG9 with CAP45 glycopeptides; and c) PG16 with ZM109 and CAP45 glycopeptides.

**Supplementary Table 1.  $K_D$  values ( $\mu\text{M}$ ) of PG9 and PG16 Fab binding with the synthetic ZM109/CAP45 glycopeptides and the scaffolded V1V2 domains**

| Fab  | ZM-GP1 | ZM-GP2  | ZM-GP2a | ZM-GP3 | ZM-GP4 | ZM-GP5  | ZM-GP6    | ZM-GP7 | ZM-GP8  | IJO8 V1V2 | ZM109 V1V2 | IFD6 V1V2 | ZM109 gp120 |
|------|--------|---------|---------|--------|--------|---------|-----------|--------|---------|-----------|------------|-----------|-------------|
| PG9  | --     | 106 ± 8 | 319 ± 9 | --     | --     | 101 ± 1 | 5.1 ± 0.5 | --     | 176 ± 4 | 0.32*     | 5.6*       | 0.09*     |             |
| PG16 | --     | --      | nd      | --     | --     | --      | 18 ± 0.3  | --     | --      | nd        | nd         | nd        |             |

  

| Fab  | CAP-GP1 | CAP-GP2 | CAP-GP2a | CAP-GP3 | CAP-GP4 | CAP-GP5 | CAP-GP6   | CAP-GP7 | CAP-GP8 | IJO8 V1V2 | CAP45 V1V2 | IFD6 V1V2 | CAP45 gp120 |
|------|---------|---------|----------|---------|---------|---------|-----------|---------|---------|-----------|------------|-----------|-------------|
| PG9  | --      | 116 ± 2 | nd       | --      | --      | 130 ± 5 | 6.9 ± 0.4 | --      | 214 ± 2 | nd        | nd         | nd        |             |
| PG16 | --      | --      | nd       | --      | --      | --      | 130 ± 2   | --      | --      | nd        | nd         | nd        |             |

“--”, no binding at 100  $\mu\text{M}$ ; “nd”, not determined; \*adapted from ref. 13.

## Supplementary Notes

### Characterization data for synthetic glycopeptides:

**Nonglycosylated cyclic ZM109 peptide.** Yield, 36% (based on solid-phase peptide synthesis, SPPS, on 0.2 mmol scale); analytical RP-HPLC,  $t_R = 24.2$  min (gradient, 15-30% aq. MeCN containing 0.1% TFA for 30 min; flow rate, 0.5 mL/min); ESI-MS: calcd M = 3094.34; found 619.73 [M + 5H]<sup>5+</sup>, 774.40 [M + 4H]<sup>4+</sup>, 1032.45 [M + 3H]<sup>3+</sup>, 1548.17 [M + 2H]<sup>2+</sup>. Deconvolution mass, 3094.25 ± 0.29.

**Glycopeptide ZM-GP1.** Yield, 38% (based on solid-phase peptide synthesis, SPPS, on 0.2 mmol scale); analytical RP-HPLC,  $t_R = 14.2$  min (gradient, 20-30% aq. MeCN containing 0.1% TFA for 30 min; flow rate, 0.5 mL/min); ESI-MS: calcd M = 3297.35; found 660.53 [M + 5H]<sup>5+</sup>, 825.40 [M + 4H]<sup>4+</sup>, 1099.68 [M + 3H]<sup>3+</sup>. Deconvolution mass, 3297.14 ± 0.32.

**Glycopeptide ZM-GP5.** Yield, 87%; analytical RP-HPLC,  $t_R = 25.1$  min (gradient, 15-30% aq. MeCN containing 0.1% TFA for 30 min; flow rate, 0.5 mL/min); ESI-MS: calcd M = 5526.93; found 1106.45 [M + 5H]<sup>5+</sup>, 1382.73 [M + 4H]<sup>4+</sup>, 1843.14 [M + 3H]<sup>3+</sup>. Deconvolution mass, 5526.81 ± 0.15.

**Glycopeptide ZM-GP6.** Yield, 95%; analytical RP-HPLC,  $t_R = 17.4$  min (gradient, 20-22% aq. MeCN containing 0.1% TFA for 30 min; flow rate, 0.5 mL/min); ESI-MS: calcd M = 6517.30; found 1304.88 [M + 5H]<sup>5+</sup>, 1630.59 [M + 4H]<sup>4+</sup>. Deconvolution mass, 6516.74 ± 1.23.

**Glycopeptide ZM-GP6d.** Obtained from ZM-GP6 by treatment with Endo-D.; Yield, 86%; analytical RP-HPLC,  $t_R = 22.9$  min (gradient, 20-22% aq. MeCN containing 0.1% TFA for 30 min; flow rate, 0.5 mL/min); ESI-MS: calcd M = 5503.96; found 1101.80 [M + 5H]<sup>5+</sup>, 1377.14 [M + 4H]<sup>4+</sup>. Deconvolution mass, 5504.0 ± 0.56.

**Glycopeptide ZM-GP7.** Yield, 89%; analytical RP-HPLC,  $t_R = 17.3$  min (gradient, 20-22% aq. MeCN containing 0.1% TFA for 30 min; flow rate, 0.5 mL/min); ESI-MS: calcd M = 6517.30; found 1087.10  $[M + 6H]^{6+}$ , 1304.18  $[M + 5H]^{5+}$ , 1629.90  $[M + 4H]^{4+}$ . Deconvolution mass,  $6516.60 \pm 0.89$ .

**Glycopeptide ZM-GP8.** From sialidase treatment of ZM-GP6.; Yield, 93%; analytical RP-HPLC,  $t_R = 24.6$  min (gradient, 20-22% aq. MeCN containing 0.1% TFA for 30 min; flow rate, 0.5 mL/min); ESI-MS: calcd M = 5933.01; found 1187.92  $[M + 5H]^{5+}$ , 1484.56  $[M + 4H]^{4+}$ . Deconvolution mass,  $5933.59 \pm 0.56$ .

**Glycopeptide ZM-GP9.** From solid phase peptide synthesis (SPPS); Yield, 37%; analytical RP-HPLC,  $t_R = 28.8$  min (gradient, 15-30% aq. MeCN containing 0.1% TFA for 30 min; flow rate, 0.5 mL/min); ESI-MS: calcd M = 3500.36; found 701.45  $[M + 5H]^{5+}$ , 876.55  $[M + 4H]^{4+}$ , 1168.42  $[M + 3H]^{3+}$ . Deconvolution mass,  $3500.24 \pm 0.21$ .

**Glycopeptide ZM-GP10.** From control transglycosylation reaction; Yield, 24%; analytical RP-HPLC,  $t_R = 23.5$  min (gradient, 20-22% aq. MeCN containing 0.1% TFA for 30 min; flow rate, 0.5 mL/min); ESI-MS: calcd M = 4513.70; found 903.78  $[M + 5H]^{5+}$ , 1129.33  $[M + 4H]^{4+}$ , 1505.58  $[M + 3H]^{3+}$ . Deconvolution mass,  $4513.31 \pm 0.43$ .

**Glycopeptide ZM-GP11.** From control transglycosylation reaction; Yield, 24%; analytical RP-HPLC,  $t_R = 25.5$  min (gradient, 20-22% aq. MeCN containing 0.1% TFA for 30 min; flow rate, 0.5 mL/min); ESI-MS: calcd M = 4513.70; found 903.79  $[M + 5H]^{5+}$ , 1129.29  $[M + 4H]^{4+}$ , 1505.59  $[M + 3H]^{3+}$ . Deconvolution mass,  $4513.95 \pm 0.43$ .

**Nonglycosylated cyclic CAP45 peptide.** Yield, 34% (based on solid-phase peptide synthesis, SPPS); analytical RP-HPLC,  $t_R = 18.8$  min (gradient, 25-40% aq. MeCN containing 0.1% TFA for 30 min; flow rate, 0.5 mL/min); ESI-MS: calcd M = 3132.41; found 784.02  $[M + 4H]^{4+}$ , 1044.98  $[M + 3H]^{3+}$ , 1567.37  $[M + 2H]^{2+}$ . Deconvolution mass,  $3132.41 \pm 0.07$



**Glycopeptide CAP-GP1.** Yield, 39% (based on solid-phase peptide synthesis, SPPS); analytical RP-HPLC,  $t_R = 21.3$  min (gradient, 0-90% aq. MeCN containing 0.1% TFA for 30 min; flow rate, 0.5 mL/min); ESI-MS: calcd  $M = 3335.42$ ; found 834.79  $[M + 4H]^{4+}$ , 1112.36  $[M + 3H]^{3+}$ , 1168.51  $[M + 2H]^{2+}$ . Deconvolution mass,  $3335.12 \pm 0.24$ .

**Glycopeptide CAP-GP2.** Yield, 82%; analytical RP-HPLC,  $t_R = 16.7$  min (gradient, 0-90% aq. MeCN containing 0.1% TFA for 30 min; flow rate, 0.5 mL/min); ESI-MS: calcd  $M = 4348.76$ ; found 870.69  $[M + 5H]^{5+}$ , 1088.00  $[M + 4H]^{4+}$ , 1450.30  $[M + 3H]^{3+}$ . Deconvolution mass,  $4348.10 \pm 0.64$ .

**Glycopeptide CAP-GP5.** Yield, 83%; analytical RP-HPLC,  $t_R = 16.2$  min (gradient, 23-25% aq. MeCN containing 0.1% TFA for 30 min; flow rate, 0.5 mL/min); ESI-MS: calcd  $M = 5565.12$ ; found 1113.98  $[M + 5H]^{5+}$ , 1392.08  $[M + 4H]^{4+}$ , 1855.67  $[M + 3H]^{3+}$ . Deconvolution mass,  $5564.72 \pm 0.66$ .

**Glycopeptide CAP-GP6.** Yield, 83%; analytical RP-HPLC,  $t_R = 16.9$  min (gradient, 23-25% aq. MeCN containing 0.1% TFA for 35 min; flow rate, 0.5 mL/min); ESI-MS: calcd  $M = 6553.46$ ; found 1093.33  $[M + 6H]^{6+}$ , 1311.62  $[M + 5H]^{5+}$ , 1639.14  $[M + 4H]^{4+}$ . Deconvolution mass,  $6553.17 \pm 0.56$ .

**Glycopeptide CAP-GP6d.** Obtained from CAP-GP6 by treatment with Endo-D.; Yield, 87%; analytical RP-HPLC,  $t_R = 21.0$  min (gradient, 23-25% aq. MeCN containing 0.1% TFA for 30 min; flow rate, 0.5 mL/min); ESI-MS: calcd  $M = 5541.22$ ; found 1109.86  $[M + 5H]^{5+}$ , 1386.75  $[M + 4H]^{4+}$ . Deconvolution mass,  $5543.0 \pm 1.30$ .

**Glycopeptide CAP-GP7.** Yield, 87%; analytical RP-HPLC,  $t_R = 20.4$  min (gradient, 0-90% aq. MeCN containing 0.1% TFA for 30 min; flow rate, 0.5 mL/min); ESI-MS: calcd  $M = 6553.46$ ; found 1311.83  $[M + 5H]^{5+}$ , 1639.35  $[M + 4H]^{4+}$ , 2185.43  $[M + 3H]^{3+}$ . Deconvolution mass,  $6554.93 \pm 1.33$ .

**Glycopeptide CAP-GP8.** From sialidase treatment of CAP-GP6.; Yield, 83%; analytical RP-HPLC,  $t_R = 24.8$  min (gradient, 20-30% aq. MeCN containing 0.1% TFA for 30 min; flow rate, 0.5 mL/min); ESI-

MS: calcd M = 5972.60; found 1195.51 [M + 5H]<sup>5+</sup>, 1494.06 [M + 4H]<sup>4+</sup>, 1992.65 [M + 3H]<sup>3+</sup>.  
Deconvolution mass, 5972.36 ± 0.14.

**Glycopeptide CAP-GP9.** From solid phase peptide synthesis (SPPS); Yield, 36%; analytical RP-HPLC, t<sub>R</sub> = 31.5 min (gradient, 23-25% aq. MeCN containing 0.1% TFA for 35 min; flow rate, 0.5 mL/min); ESI-MS: calcd M = 3538.43; found 708.61 [M + 5H]<sup>5+</sup>, 885.59 [M + 4H]<sup>4+</sup>, 1180.27 [M + 3H]<sup>3+</sup>, 1770.39 [M + 2H]<sup>2+</sup>. Deconvolution mass, 3538.43 ± 1.00.

**Glycopeptide CAP-GP10.** From the controlled transglycosylation reaction: Yield, 24%; analytical RP-HPLC, t<sub>R</sub> = 23.8 min (gradient, 23-25% aq. MeCN containing 0.1% TFA for 35 min; flow rate, 0.5 mL/min); ESI-MS: calcd M = 4551.77; found 912.44 [M + 5H]<sup>5+</sup>, 1138.96 [M + 4H]<sup>4+</sup>, 1518.09 [M + 3H]<sup>3+</sup>. Deconvolution mass, 4551.80 ± 0.0.

**Glycopeptide CAP-GP11.** From controlled transglycosylation reaction: Yield, 23%; analytical RP-HPLC, t<sub>R</sub> = 22.2 min (gradient, 23-25% aq. MeCN containing 0.1% TFA for 35 min; flow rate, 0.5 mL/min); ESI-MS: calcd M = 4551.77; found 912.36 [M + 5H]<sup>5+</sup>, 1138.89 [M + 4H]<sup>4+</sup>, 1518.01 [M + 3H]<sup>3+</sup>. Deconvolution mass 4551.28 ± 0.27.
